# Supplementary material for: PMS2CL interference leading to erroneous identification of a pathogenic PMS2 variant in Black patients
Source: PubMed Central journal article supplement — Genet Med Open. 2024 Jun 10;2:101858. doi: 10.1016/j.gimo.2024.101858 (PMC11613782; doi:10.1016/j.gimo.2024.101858), 2024-06-10
Supplement: mmc1.pdf [file mmc1.pdf]

## Supplementary Materials

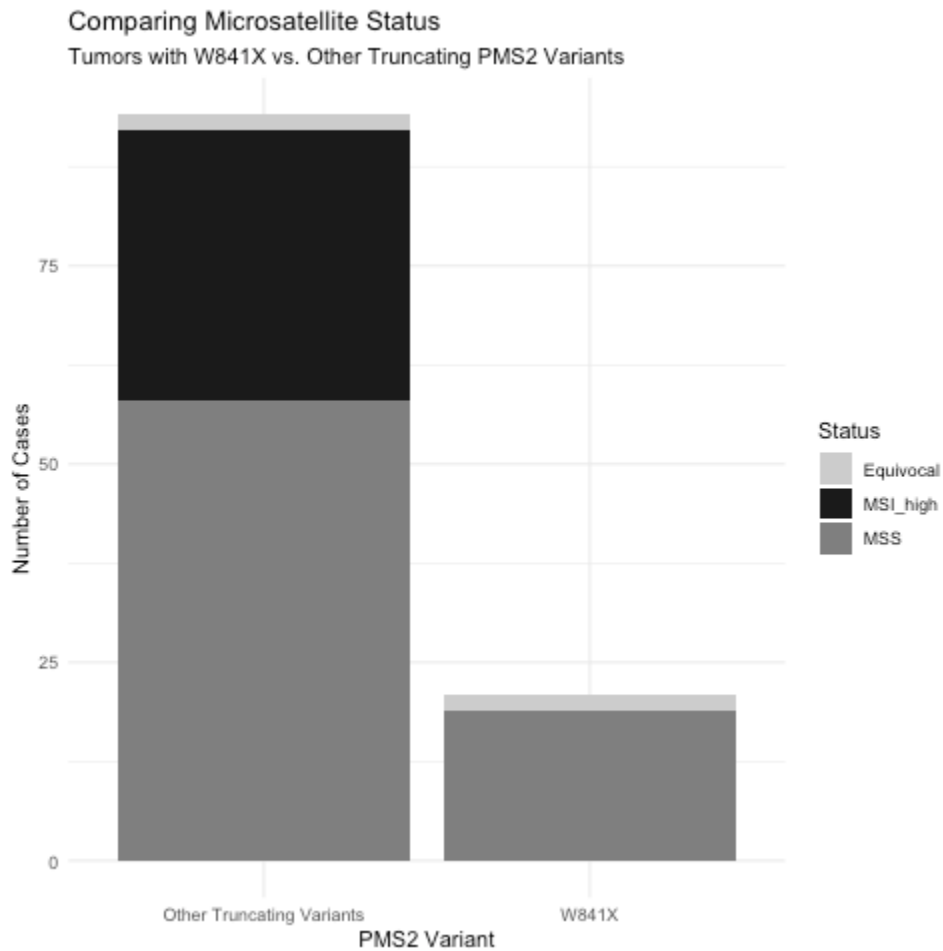

**Supplemental Figure 1: Comparing MS status for tumors containing the W841\* variant versus tumors containing other truncating PMS2 variants.** 19 of 21 tumors with W841\* were MSS, none were MSI-high and two were equivocal. Of the 94 tumors with other truncating PMS2 variants, 58 were MSS, 34 were MSI-high, and two were equivocal.

**Supplementary Table 1: PMS2 Somatic Variants in tumors with data on microsatellite status**

| HGVS Transcript | Gene | HGVS c.          | HGVS p.       | ACMG Classification                       | ClinVar ID     |
|-----------------|------|------------------|---------------|-------------------------------------------|----------------|
| NM_000535.7     | PMS2 | c.12dup          | p.(E5*)       | Pathogenic                                | 1406959        |
| NM_000535.7     | PMS2 | c.23+1G>T        | p.?           | Pathogenic/Likely Pathogenic              | 141871         |
| NM_000535.7     | PMS2 | c.24-1G>A        | p.?           | Pathogenic/Likely pathogenic              | 924601         |
| NM_000535.7     | PMS2 | c.164-1G>C       | p.?           | Pathogenic/Likely Pathogenic              | 186061         |
| NM_000535.7     | PMS2 | c.241G>T         | p.(E81*)      | Pathogenic/Likely Pathogenic              | 439243         |
| NM_000535.7     | PMS2 | c.248T>G         | p.(L83*)      | Pathogenic/Likely Pathogenic              | 419752         |
| NM_000535.7     | PMS2 | c.251-2A>T       | p.?           | Pathogenic/Likely Pathogenic              | 183893         |
| NM_000535.7     | PMS2 | c.325del         | p.(E109fs*3)  | Pathogenic                                | 141395         |
| NM_000535.7     | PMS2 | c.354-1G>A       | p.?           | Pathogenic/Likely Pathogenic              | 187726         |
| NM_000535.7     | PMS2 | c.354-2A>G       | p.?           | Pathogenic/Likely Pathogenic              | 185340         |
| NM_000535.7     | PMS2 | c.400C>T         | p.(R134*)     | Pathogenic                                | 9234           |
| NM_000535.7     | PMS2 | c.433C>T         | p.(Q145*)     | Pathogenic                                | 1739846        |
| NM_000535.7     | PMS2 | c.538-1G>A       | p.?           | Pathogenic/Likely Pathogenic              | 948334         |
| NM_000535.7     | PMS2 | c.538-1G>C       | p.?           | Pathogenic/Likely Pathogenic              | 434027         |
| NM_000535.7     | PMS2 | c.538G>T         | p.(E180fs*21) | Pathogenic/Likely Pathogenic              | 1747225        |
| NM_000535.7     | PMS2 | c.631C>T         | p.(R211*)     | Pathogenic                                | 234508         |
| NM_000535.7     | PMS2 | c.697C>T         | p.(Q233*)     | Pathogenic                                | 91362          |
| NM_000535.7     | PMS2 | c.703C>T         | p.(Q235*)     | Pathogenic                                | 91363          |
| NM_000535.7     | PMS2 | c.706-1G>T       | p.?           | Likely Pathogenic                         | 1756960        |
| NM_000535.7     | PMS2 | c.730C>T         | p.(Q244*)     | Pathogenic                                | 620098         |
| NM_000535.7     | PMS2 | c.735dup         | p.(P246fs*3)  | Pathogenic                                | 1074077        |
| NM_000535.7     | PMS2 | c.750del         | p.(V251fs*7)  | Pathogenic                                | 2674259        |
| NM_000535.7     | PMS2 | c.765C>A         | p.(Y255*)     | Pathogenic                                | 183716         |
| NM_000535.7     | PMS2 | c.79del          | p.(C27fs*7)   | Pathogenic/Likely Pathogenic              | 1761572        |
| NM_000535.7     | PMS2 | c.802del         | p.(Y268fs*31) | Pathogenic/Likely Pathogenic              | 922836         |
| NM_000535.7     | PMS2 | c.802dup         | p.(Y268fs*39) | Pathogenic                                | 91369          |
| NM_000535.7     | PMS2 | c.804-1G>A       | p.?           | Pathogenic(1)/Likely Pathogenic(3)/VUS(1) | 573060         |
| NM_000535.7     | PMS2 | c.823C>T         | p.(Q275*)     | Pathogenic                                | 127796         |
| NM_000535.7     | PMS2 | c.828C>A         | p.(C276*)     | Pathogenic                                | 421403         |
| NM_000535.7     | PMS2 | c.861_864del     | p.(R287fs*19) | Pathogenic                                | 91375          |
| NM_000535.7     | PMS2 | c.862_863del     | p.(Q288fs*10) | Pathogenic                                | 91376          |
| NM_000535.7     | PMS2 | c.903G>A         | p.?           | Pathogenic/Likely Pathogenic              | 237932         |
| NM_000535.7     | PMS2 | c.1145-2A>G      | p.?           | Likely Pathogenic                         | 822245         |
| NM_000535.7     | PMS2 | c.1239del        | p.(D414fs*34) | Pathogenic                                | 1171824        |
| NM_000535.7     | PMS2 | c.1239dup        | p.(D414fs*44) | Pathogenic                                | 216072         |
| NM_000535.7     | PMS2 | c.1261C>T        | p.(R421*)     | Pathogenic                                | 91299          |
| NM_000535.7     | PMS2 | c.1264G>T        | p.(E422*)     | Pathogenic                                | 525843         |
| NM_000535.7     | PMS2 | c.1266_1281del   | p.(E44fs*13)  | Pathogenic                                | 2674271        |
| NM_000535.7     | PMS2 | c.1351del        | p.(R451fs*7)  | Likely Pathogenic                         | 633373         |
| NM_000535.7     | PMS2 | c.139_146del     | p.(L47fs*4)   | Pathogenic/Likely Pathogenic              | 265547         |
| NM_000535.7     | PMS2 | c.1471G>T        | p.(E491*)     | Pathogenic/Likely Pathogenic              | 486935         |
| NM_000535.7     | PMS2 | c.1591G>T        | p.(E531*)     | Pathogenic                                | 237890         |
| NM_000535.7     | PMS2 | c.1606C>T        | p.(Q536*)     | Pathogenic                                | 486937         |
| NM_000535.7     | PMS2 | c.1687C>T        | p.(R563*)     | Pathogenic                                | 135067         |
| NM_000535.7     | PMS2 | c.1743del        | p.(E582fs*8)  | Pathogenic                                | 372470         |
| NM_000535.7     | PMS2 | c.1810C>T        | p.(Q604*)     | Pathogenic/Likely Pathogenic              | 858883         |
| NM_000535.7     | PMS2 | c.1831del        | p.(I611fs*2)  | Pathogenic                                | 1780965        |
| NM_000535.7     | PMS2 | c.1924del        | p.(E642*)     | Pathogenic/Likely Pathogenic              | 1404626        |
| NM_000535.7     | PMS2 | c.1927C>T        | p.(Q643*)     | Pathogenic                                | 91320          |
| NM_000535.7     | PMS2 | c.1939A>T        | p.(K647*)     | Pathogenic                                | 91321          |
| NM_000535.7     | PMS2 | c.1972C>T        | p.(Q658*)     | Pathogenic                                | 1451259        |
| NM_000535.7     | PMS2 | c.1981G>T        | p.(E661*)     | Pathogenic                                | 185743         |
| NM_000535.7     | PMS2 | c.2156del        | p.(Q719fs*6)  | Pathogenic                                | 183755         |
| NM_000535.7     | PMS2 | c.2331dup        | p.(F778fs*8)  | Pathogenic                                | 2674214        |
| NM_000535.7     | PMS2 | loss exons 2-11  | p.?           | Likely Pathogenic                         | Not in Clinvar |
| NM_000535.7     | PMS2 | loss exons 13-14 | p.?           | Likely Pathogenic                         | Not in Clinvar |
| NM_000535.7     | PMS2 | c.2006+2T>C      | p.?           | Likely Pathogenic                         | Not in Clinvar |
| NM_000535.7     | PMS2 | Not provided(1)  | p.(C73fs*6)   | Likely Pathogenic                         | Not in Clinvar |
| NM_000535.7     | PMS2 | Not provided(1)  | p.(G466fs*3)  | Likely Pathogenic                         | Not in Clinvar |
| NM_000535.7     | PMS2 | Not provided(1)  | p.(I688fs*5)  | Likely Pathogenic                         | Not in Clinvar |
| NM_000535.7     | PMS2 | Not provided(1)  | p.(Q161*)     | Likely Pathogenic                         | Not in Clinvar |
| NM_000535.7     | PMS2 | Not provided(1)  | p.(S478fs*4)  | Likely Pathogenic                         | Not in Clinvar |

1: cDNA position not provided
